# Supplementary material
Source: MDPI journal article supplement (https://www.mdpi.com/2311-7524/8/2/180)
Supplement: s1 [file s1]

**Table S1.** Primers for pathogen identification<sup>y</sup>

| Primer name | Forward (F) and Reverse (R) primer | Reference                   |
|-------------|------------------------------------|-----------------------------|
| ITS1        | GAA GGT GAA GTC GTA ACA AGG        | White et al. 1990           |
| ITS4        | TCC TCC GCT TAT TGA TAT GC         | White et al. 1990           |
| GDF         | GCC GTC AAC GAC CCC TTC ATT GA     | Guerber et al. 2003         |
| GDR         | GGG TGG AGT CGT ACT TGA GCA TGT    | Templeton et al. 1992       |
| CHS-79F     | TGG GGC AAG GAT GCT TGG AAG AAG    | Carhone and Kohn 1999       |
| CHS-345R    | TGG AAG AAC CAT CTG TGA GAG TTG    | Carhone and Kohn 1999       |
| ACT-512F    | ATG TGC AAG GCC GGT TTC GC         | Carhone and Kohn 1999       |
| ACT-783R    | TAC GAG TCC TCC TGG CCC AT         | Carhone and Kohn 1999       |
| TUB2-T1     | AAC ATG CGT GAG ATT GTA AGT        | O'Donnell and Cigelnik 1997 |
| TUB2-Bt2b   | ACC CTC AGT GTA GTG ACC CTT GGC    | Glass and Donaldson 1995    |

<sup>y</sup>GAPDH=glyceraldehyde-3-phosphate dehydrogenase, ITS=internal transcribed spacer, ACT=actin, TUB2=beta-tubulin gene, CHS=chalcone synthase.
